# Supplementary material
Source: publisher site journal article supplement (https://www.dovepress.com/get_supplementary_file.php?f=436551.docx)
Supplement: Supplementary file 1 [file get_supplementary_file.php]

**Supplementary Table 1. The relative OTU abundance of intestinal microbiota at the phylum level was compared between COPD patients and healthy controls by Wilcoxon test.**

|  | COPD | Health | q-value |
| --- | --- | --- | --- |
| Bacteroidetes | 40.23377 | 45.05140 | 0.51872 |
| Firmicutes | 39.48981 | 40.78573 | 0.59968 |
| Proteobacteria | 10.76645 | 9.46841 | 0.55924 |
| Fusobacteria | 4.08696 | 1.92644 | 0.53961 |
| Actinobacteria | 3.56945 | 2.39383 | 0.80542 |
| Verrucomicrobia | 1.49974 | 0.21839 | 0.51872 |
| Cyanobacteria | 0.18215 | 0.11282 | 0.55866 |
| Synergistetes | 0.08990 | 0.02974 | 0.53961 |
| Spirochaetes | 0.03618 | 0.00043 | 0.59968 |
| TM7 | 0.01176 | 0.00272 | 0.08953 |
| Euryarchaeota | 0.00819 | 0.00098 | 0.08907 |

**Supplementary Table 2. The relative OTU abundance of intestinal microbiota at the genus level was compared between between COPD patients and healthy controls by Wilcoxon test.**

| Genus | COPD | Health | q-value |
| --- | --- | --- | --- |
| Bacteroides | 28.14067 | 24.58759 | 0.61291 |
| Prevotella | 4.91644 | 15.70942 | 0.11138 |
| Faecalibacterium | 4.24371 | 6.05375 | 0.02932 |
| Roseburia | 2.21057 | 4.10112 | 0.00028 |
| Blautia | 2.78586 | 2.92105 | 0.29745 |
| Lachnospira | 0.67811 | 4.58620 | 0.00000 |
| Megamonas | 2.61506 | 1.64394 | 0.90198 |
| Parabacteroides | 3.15793 | 1.01246 | 0.00886 |
| Oscillospira | 2.45090 | 1.60236 | 0.43400 |
| Phascolarctobacterium | 2.27152 | 1.60038 | 0.48520 |
| Ruminococcus | 1.87112 | 1.90337 | 0.23718 |
| Bifidobacterium | 1.65808 | 1.25223 | 0.49221 |
| Coprococcus | 0.81784 | 1.75577 | 0.00051 |
| Klebsiella | 1.06155 | 1.41696 | 0.00639 |
| Dorea | 1.29360 | 1.04875 | 0.23976 |
| Collinsella | 1.40296 | 0.85709 | 0.79664 |
| Sutterella | 0.83279 | 1.12781 | 0.29281 |
| Akkermansia | 1.49900 | 0.21797 | 0.32671 |
| Megasphaera | 1.23361 | 0.31872 | 0.32671 |
| Streptococcus | 0.69652 | 0.45180 | 0.58717 |
| Lactobacillus | 0.68800 | 0.15636 | 0.65584 |
| Veillonella | 0.56011 | 0.16277 | 0.75696 |
| Desulfovibrio | 0.39115 | 0.30102 | 0.78948 |
| Acidaminococcus | 0.44937 | 0.21846 | 0.90198 |
| Bilophila | 0.37760 | 0.20008 | 0.61291 |
| Enterococcus | 0.52446 | 0.03368 | 0.02620 |
| cc_115 | 0.30656 | 0.22805 | 0.35385 |
| Anaerostipes | 0.03088 | 0.32313 | 0.00042 |
| Clostridium | 0.12904 | 0.16799 | 0.00672 |
| Eggerthella | 0.18940 | 0.09555 | 0.54560 |
| Dialister | 0.04954 | 0.23685 | 0.01638 |
| Lachnobacterium | 0.03950 | 0.24244 | 0.00882 |
| Citrobacter | 0.07035 | 0.20878 | 0.00042 |
| Fusobacterium | 0.24310 | 0.00583 | 0.71576 |
| Haemophilus | 0.04845 | 0.15279 | 0.00042 |
| SMB53 | 0.07637 | 0.07906 | 0.18215 |
| Pseudomonas | 0.12195 | 0.00652 | 0.24737 |
| Coprobacillus | 0.09785 | 0.02777 | 0.44964 |
| Succinivibrio | 0.00158 | 0.12505 | 0.43400 |
| Slackia | 0.04695 | 0.02439 | 0.63617 |
| Turicibacter | 0.01989 | 0.04148 | 0.20361 |
| Actinomyces | 0.03614 | 0.01835 | 0.01542 |
| Holdemania | 0.02450 | 0.02704 | 0.38138 |
| Proteus | 0.04330 | 0.00140 | 0.13805 |
| Pseudoramibacter_Eubacterium | 0.03192 | 0.01082 | 0.02118 |
| Anaerotruncus | 0.02748 | 0.01281 | 0.41793 |
| Catenibacterium | 0.03463 | 0.00262 | 0.43147 |
| Cloacibacillus | 0.03375 | 0.00341 | 0.32671 |
| Sphaerochaeta | 0.03609 | 0.00043 | 0.78948 |
| Synergistes | 0.02513 | 0.01196 | 0.83379 |
| Epulopiscium | 0.01475 | 0.02245 | 0.39534 |
| Mitsuokella | 0.00965 | 0.02340 | 0.40663 |
| Adlercreutzia | 0.00982 | 0.01629 | 0.11454 |
| Rothia | 0.01620 | 0.00412 | 0.09573 |
| Arcobacter | 0.01868 | 0.00026 | 0.43400 |
| Oxalobacter | 0.00977 | 0.00773 | 0.54560 |
| Salmonella | 0.00658 | 0.00817 | 0.11454 |
| Sphingobacterium | 0.01295 | 0.00024 | 0.75610 |
| Achromobacter | 0.01287 | 0.00017 | 0.61291 |
| Morganella | 0.01055 | 0.00091 | 0.39534 |
| Plesiomonas | 0.00635 | 0.00386 | 0.41793 |
| Comamonas | 0.00802 | 0.00152 | 0.73953 |
| Methanobrevibacter | 0.00739 | 0.00085 | 0.11454 |
| Lactococcus | 0.00359 | 0.00328 | 0.09573 |
| Leucobacter | 0.00516 | 0.00010 | 0.18215 |
| Brevundimonas | 0.00489 | 0.00011 | 0.65584 |
| Gardnerella | 0.00328 | 0.00007 | 0.11454 |

**Supplementary Table 3. The relative OTU abundance of intestinal microbiota at the Phylum level was compared between female and male in COPD patients by Wilcoxon test.**

| Phylum | female | male | q-value |
| --- | --- | --- | --- |
| Bacteroidetes | 40.87066 | 39.79952 | 0.89070 |
| Firmicutes | 38.29496 | 40.30447 | 0.89070 |
| Proteobacteria | 10.10759 | 11.21568 | 0.89070 |
| Fusobacteria | 4.43599 | 3.84898 | 0.89070 |
| Actinobacteria | 4.66411 | 2.82310 | 0.89070 |
| Verrucomicrobia | 1.43617 | 1.54309 | 0.89070 |
| Cyanobacteria | 0.02259 | 0.29093 | 0.89070 |
| Synergistetes | 0.03593 | 0.12670 | 0.89070 |
| Spirochaetes | 0.08801 | 0.00084 | 0.89070 |
| TM7 | 0.00427 | 0.01687 | 0.89070 |
| Euryarchaeota | 0.00648 | 0.00935 | 0.89070 |

**Supplementary Table 4. The relative OTU abundance of intestinal microbiota at the genus level was compared between female and male in COPD patients by Wilcoxon test.**

| Genus | female | male | q-value |
| --- | --- | --- | --- |
| Bacteroides | 29.64074 | 27.11789 | 0.94242 |
| Prevotella | 3.88985 | 5.61638 | 0.97391 |
| Faecalibacterium | 4.32004 | 4.19167 | 0.97391 |
| Parabacteroides | 3.86067 | 2.67879 | 0.94242 |
| Blautia | 1.95473 | 3.35255 | 0.94242 |
| Megamonas | 3.60959 | 1.93696 | 0.94242 |
| Oscillospira | 2.59601 | 2.35196 | 0.98387 |
| Phascolarctobacterium | 1.55594 | 2.75941 | 0.94242 |
| Roseburia | 1.34015 | 2.80405 | 1.00000 |
| Ruminococcus | 0.89691 | 2.53536 | 0.94242 |
| Bifidobacterium | 2.98996 | 0.74997 | 0.94242 |
| Akkermansia | 1.43493 | 1.54268 | 0.94242 |
| Collinsella | 1.12910 | 1.58969 | 0.94242 |
| Dorea | 1.28386 | 1.30024 | 0.94242 |
| Megasphaera | 1.42175 | 1.10532 | 0.97391 |
| Klebsiella | 1.33370 | 0.87599 | 0.94242 |
| Sutterella | 1.49330 | 0.38244 | 0.10967 |
| Coprococcus | 0.89105 | 0.76792 | 0.97391 |
| Streptococcus | 1.46391 | 0.17330 | 0.94242 |
| Lactobacillus | 1.45866 | 0.16255 | 0.94242 |
| Lachnospira | 0.73262 | 0.64094 | 0.97391 |
| Veillonella | 0.30809 | 0.73194 | 0.94625 |
| Enterococcus | 0.54772 | 0.50861 | 0.94242 |
| Acidaminococcus | 0.41277 | 0.47433 | 0.94242 |
| Desulfovibrio | 0.46782 | 0.33887 | 0.97391 |
| Bilophila | 0.25197 | 0.46326 | 0.94242 |
| cc_115 | 0.27371 | 0.32896 | 0.94625 |
| Fusobacterium | 0.00379 | 0.40626 | 0.97391 |
| Eggerthella | 0.09391 | 0.25450 | 0.97391 |
| Clostridium | 0.10595 | 0.14479 | 0.97391 |
| Pseudomonas | 0.00594 | 0.20105 | 0.94242 |
| Coprobacillus | 0.10141 | 0.09543 | 0.94242 |
| SMB53 | 0.02767 | 0.10957 | 0.94242 |
| Citrobacter | 0.02410 | 0.10188 | 0.94242 |
| Dialister | 0.05378 | 0.04665 | 0.94242 |
| Haemophilus | 0.08781 | 0.02161 | 1.00000 |
| Slackia | 0.06159 | 0.03696 | 0.94242 |
| Proteus | 0.00928 | 0.06649 | 0.94625 |
| Lachnobacterium | 0.01599 | 0.05553 | 0.94625 |
| Actinomyces | 0.03757 | 0.03516 | 0.94625 |
| Sphaerochaeta | 0.08801 | 0.00069 | 0.94242 |
| Catenibacterium | 0.02567 | 0.04074 | 0.94242 |
| Cloacibacillus | 0.00267 | 0.05495 | 0.94242 |
| Pseudoramibacter_Eubacterium | 0.02831 | 0.03438 | 0.94242 |
| Anaerostipes | 0.01901 | 0.03897 | 0.94242 |
| Anaerotruncus | 0.01841 | 0.03366 | 0.94242 |
| Synergistes | 0.00486 | 0.03895 | 0.94242 |
| Holdemania | 0.01131 | 0.03350 | 0.94242 |
| Turicibacter | 0.02612 | 0.01564 | 1.00000 |
| Arcobacter | 0.00007 | 0.03137 | 0.94242 |
| Rothia | 0.02871 | 0.00767 | 0.94242 |
| Epulopiscium | 0.03317 | 0.00218 | 0.97391 |
| Sphingobacterium | 0.00000 | 0.02178 | 0.94242 |
| Achromobacter | 0.00000 | 0.02164 | 0.94242 |
| Morganella | 0.02059 | 0.00370 | 0.94242 |
| Adlercreutzia | 0.00648 | 0.01210 | 0.94242 |
| Oxalobacter | 0.00715 | 0.01155 | 0.94242 |
| Mitsuokella | 0.01460 | 0.00628 | 0.97391 |
| Comamonas | 0.00033 | 0.01325 | 0.94625 |
| Methanobrevibacter | 0.00562 | 0.00860 | 0.94242 |
| Salmonella | 0.00137 | 0.01014 | 0.97391 |
| Plesiomonas | 0.00052 | 0.01032 | 0.97391 |
| Leucobacter | 0.00007 | 0.00863 | 0.94242 |
| Brevundimonas | 0.00022 | 0.00807 | 0.94242 |
| Lactococcus | 0.00101 | 0.00535 | 0.94242 |
| Gardnerella | 0.00015 | 0.00541 | 0.94242 |

**Supplementary Table 5. The exact p-value of Spearman correlation analysis regarding differential intestinal microbiota and clinical characteristics**

| var | Age | gender | Leukocyte | Neutrophils proportion | Smoking index | FEV1/FVC(%) | FEV1%Pred |
| --- | --- | --- | --- | --- | --- | --- | --- |
| Faecalibacterium | 0.19597 | 0.66169 | 0.16424 | 0.13875 | 0.05105 | 0.01501 | 0.02050 |
| Roseburia | 0.23662 | 0.81382 | 0.20190 | 0.03582 | 0.00018 | 0.00002 | 0.00008 |
| Lachnospira | 0.68781 | 0.05057 | 0.42822 | 0.07257 | 0.00000 | 0.00000 | 0.00000 |
| Parabacteroides | 0.49105 | 0.94636 | 0.89824 | 0.44444 | 0.00241 | 0.00663 | 0.04678 |
| Coprococcus | 0.86834 | 0.44484 | 0.62331 | 0.20676 | 0.00002 | 0.00033 | 0.00116 |
| Klebsiella | 0.82757 | 0.32209 | 0.47897 | 0.06719 | 0.00019 | 0.00269 | 0.00049 |
| Enterococcus | 0.32443 | 0.77055 | 0.70803 | 0.65059 | 0.19368 | 0.03097 | 0.06891 |
| Anaerostipes | 0.59540 | 0.85319 | 0.69104 | 0.06808 | 0.00281 | 0.00004 | 0.00004 |
| Clostridium | 0.12720 | 0.80947 | 0.53605 | 0.26936 | 0.00085 | 0.00002 | 0.00113 |
| Dialister | 0.71395 | 0.68216 | 0.62753 | 0.02798 | 0.00014 | 0.00583 | 0.00155 |
| Lachnobacterium | 0.98413 | 0.15597 | 0.90792 | 0.51400 | 0.22398 | 0.00424 | 0.00941 |
| Citrobacter | 0.17707 | 0.90627 | 0.03254 | 0.02297 | 0.00260 | 0.00013 | 0.00007 |
| Haemophilus | 0.44570 | 0.33044 | 0.03518 | 0.04936 | 0.00006 | 0.00010 | 0.00003 |
| Actinomyces | 0.96910 | 0.17378 | 0.79757 | 0.67996 | 0.35861 | 0.00538 | 0.02264 |
| Pseudoramibacter_Eubacterium | 0.00498 | 0.14620 | 0.12092 | 0.04750 | 0.11665 | 0.03614 | 0.01916 |

**Supplementary Table 6. The exact p-value of Spearman correlation analysis regarding differential intestinal microbiota and treatment regimens**

| var | ICS/LABA | LAMA/LABA | SABA | Theophylline |
| --- | --- | --- | --- | --- |
| Faecalibacterium | 0.13904 | 0.05788 | 0.35132 | 0.03123 |
| Roseburia | 0.01700 | 0.01779 | 0.08574 | 0.00032 |
| Lachnospira | 0.00253 | 0.00030 | 0.01102 | 0.00000 |
| Parabacteroides | 0.09221 | 0.00100 | 0.37145 | 0.00151 |
| Coprococcus | 0.26075 | 0.00056 | 0.35132 | 0.03315 |
| Klebsiella | 0.01221 | 0.41309 | 0.00565 | 0.00222 |
| Enterococcus | 0.02028 | 0.29555 | 0.02927 | 0.09969 |
| Anaerostipes | 0.02102 | 0.01030 | 0.13426 | 0.00075 |
| Clostridium | 0.00012 | 0.67259 | 0.00164 | 0.00161 |
| Dialister | 0.03650 | 0.58256 | 0.07132 | 0.08608 |
| Lachnobacterium | 0.29080 | 0.03937 | 0.19633 | 0.04285 |
| Citrobacter | 0.00017 | 0.34040 | 0.00164 | 0.00015 |
| Haemophilus | 0.00048 | 0.31922 | 0.00233 | 0.00068 |
| Actinomyces | 0.01365 | 0.14796 | 0.21049 | 0.01147 |
| Pseudoramibacter_Eubacterium | 0.14791 | 0.06578 | 0.04623 | 0.03044 |
